# Supplementary material for: APOL1 G1 genotype modifies the association between HDLC and kidney function in African Americans
Source: PubMed Central journal article supplement (PMC4448293; doi:10.1186/s12864-015-1645-7), 2015-05-30
Supplement: 12864_2015_1645_MOESM1_ESM.pdf [file 12864_2015_1645_MOESM1_ESM.pdf]

**Effect of variant coding on *APOL1* rs73885319 × HDLC interaction<sup>1</sup>**

| Variable             | $\beta$ (SE) | P-value |
|----------------------|--------------|---------|
| logHDL               | 3.5 (4.4)    | 0.43    |
| rs73885319 AG        | 0.05 (2.6)   | 0.98    |
| rs73885319 GG        | -1.8 (1.7)   | 0.31    |
| rs73885319 AG × HDLC | -4.0 (6.6)   | 0.54    |
| rs73885319 GG × HDLC | -46.1 (13.1) | 0.0005  |

<sup>1</sup>Results are for a model of eGFR in HUF5, NHAAN, and ARIC individuals including terms for rs73885319 (coded as # of variant alleles), HDLC, rs73885319 AG × HDLC, rs73885319 GG × HDLC, age, BMI, sex, study, and genome-wide proportion African ancestry and a random term for family.
