# Supplementary material for: APOL1 G1 genotype modifies the association between HDLC and kidney function in African Americans
Source: PubMed Central journal article supplement (PMC4448293; doi:10.1186/s12864-015-1645-7), 2015-05-30
Supplement: 12864_2015_1645_MOESM2_ESM.pdf [file 12864_2015_1645_MOESM2_ESM.pdf]

**Association between eGFR and HDLC by rs73885319 genotype, T2D and CKD included.**

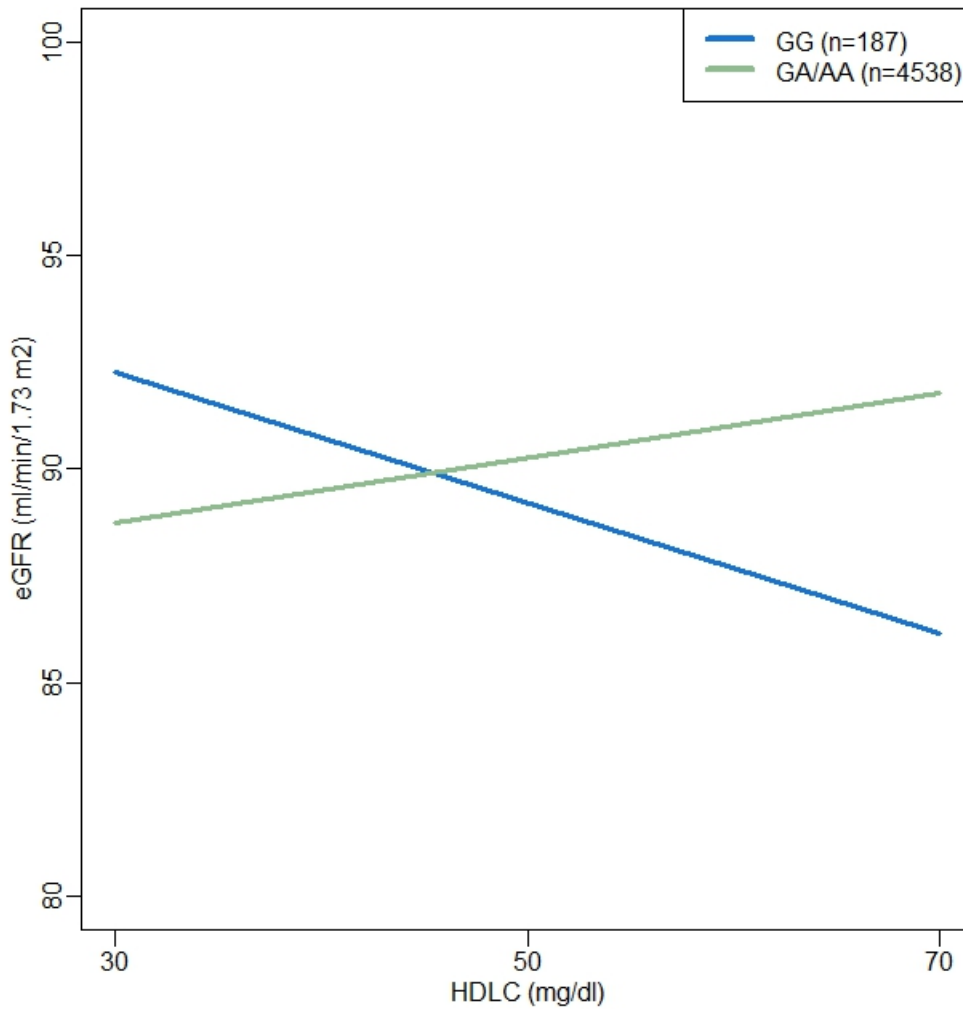

*Results from a model of eGFR as predicted by rs73885319 × HDLC, adjusted for rs73885319, HDLC, age, BMI, sex, genome-wide proportion African ancestry, study, and the random effect of family. In contrast to main models, no exclusion has been made for type 2 diabetes (T2D) or chronic kidney disease (CKD).*
